# Supplementary material for: Impacts of technology education: Summary of the conference theme and papers
Source: Springer Nature journal article supplement (doi:10.1007/s40262-019-00770-4), 1999-01-01
Supplement: MOESM1 [file 16700668]

**Supplementary Material**

**Supplementary Table S1** Summary of clinical study designs

| Study no. | Population | Dosage regimen | PK sampling | PD sampling |
| --- | --- | --- | --- | --- |
| *Healthy subjects* | | | | |
| 0713M0611 | Healthy male subjects, *N =*36 | 1, 2, 4, 10, 25, and 50 mg single dose; solution, fasted. | 1 and 2 mg: predose, 0.25, 0.5, 0.75, 1, 1.5, 2, 2.5, 3, 3.5, 4, 5, 6, 8, 10, 12, 16, 24, 36, 48, and 72 h postdose  4 to 50 mg: the above time points plus 144, 216, and 312 h postdose | — |
| 0806M0613 | Healthy male subjects, *N =*18 | 0.25, 0.5, and 2 mg dose QD for 14 days.  0.25 and 0.5 mg: solution, fed; 2 mg: 2-mg tablet, fed. | Days 1, 7, and 14: predose, 1, 2, 3, 4, 5, 6, 8, 10, 12, and 16 h postdose  Days 2 to 6, 8, and 10: predose.  Days 15 to 20: 24, 48, 72, 96, 120, and 144 h postdose | — |
| 0823M0615 | Healthy male and female subjects, *N =*24 | 0.25, 0.5, 0.75, and 1 mg dose QD for 14 days. 0.25-mg tablets, fed. | Days 1,7 and 14: predose, 1, 2, 3, 4, 5, 6, 8, 10, 12, and 16 h postdose  Days 2 to 6, 8, 10, and 12: predose.  Days 15 to 20: 24, 48, 72, 96, 120, and 144 h postdose | — |
| *CLD patients* | | | | |
| 1017M0623 | Male and female patients, *N =*34 | 0.25, 0.5, 1, 1.5, and 2 mg dose QD for 7 days with the stopping criteria based on platelet counts; 0.25-mg tablets irrespective of meals. | Predose, 2, 4, 6, 8, 24, 48, 72, 120, and 168 h after the final dosinga | Days 1 (predose), 3, 5, 6, 7, 8, 9 to 11, 9 to 16, 14, 17, 21, and 28, and at drug withdrawal and/or early termination of assessment. |
| 1112M0625 | Male and female patients, *N =*21 | 2.5, 3, and 4 mg dose QD for 7 days with the stopping criteria based on platelet counts; 0.25-mg and 2-mg tablets irrespective of meals. | Predose, 2, 4, 6, and 8 h postdose on Day 5; predose on Day 6; 24, 48, 72, and/or 96 h after the final dosing a | Days 1 (predose), 3 to 8, 9 to 11, 9 to 16, 14, 17, 21, 28, and 35, and at drug withdrawal and/or early termination of assessment. |
| 1208M0626 | Male and female patients, *N =*46 | 2, 3, and 4 mg dose QD for 7 days with the stopping criteria based on platelet counts; 1-mg tablets irrespective of meals. | Predose and one point from 6 to 8 h postdose on Day 5; 24, 48, 72, 120, and 168 h after final dosinga | Days 1 (predose), 5 to 8, 10, 12, 14, 17, 21, 28, and 35, and at drug withdrawal and/or early termination of assessment. |
| 1525M0627 | Male and female patients, *N =*5 | 3 mg dose QD for 7 days with the stopping criteria based on platelet counts; 3-mg tablets irrespective of meals. | Predose, 2, 4, 6, and 8 h postdose on Day 5; 24, 48, 72, 120, and 168 h after dosing on Day 5.a | Days 1 (predose), 3 to 8, 10, 12, 14, 17, 21, 28, and 35, and at drug withdrawal and/or early termination of assessment. |
| 1304M0631 | Male and female patients, *N =*48 | 3 mg dose QD for 7 days with the stopping criteria based on platelet counts; 3-mg tablets irrespective of meals. | Predose on Day 5 and 6–8 h after final dosing.a | Days 1 (predose), 5 to 8, 10, 12, 14, 17, 21, 28, and 35, and at drug withdrawal and/or early termination of assessment. |
| 1338M0633 | Male and female patients, *N =*94 | 3 mg dose QD for 7 days with the stopping criteria based on platelet counts; 3-mg tablets irrespective of meals. | Intensive sampling: predose, 2, 4, 6, and 8 h on Day 5, predose on Day 6, and at least 4 time points of 24, 48, 72, 120, and 168 h after the final dosing*; Sparse sampling: predose at any 2 time points from Days 5 to 7.a | Days 1 (predose), 3, 5 to 8, 10, 12, 14, 17, 21, 28, and 35, and at drug withdrawal and/or early termination of assessment. |
| 1423M0634 | Male and female patients, *N =*101 | 3 mg dose QD for 7 days with the stopping criteria based on platelet counts; 3-mg tablets irrespective of meals. | Intensive sampling: predose, 2, 4, 6, 8, 24, and 48 h after the dosing on Day 5; Sparse sampling: predose, 2 to 4, 24, and 48 h after the dosing on Day 5. | Days 1 (predose), 5 to 8, 10, 12, 14, 17, 21, 28, and 35, and at drug withdrawal and/or early termination of assessment. |

PK, pharmacokinetic; PD, pharmacodynamic; QD, once daily.

aThe PK sampling for patients who received for 7 days was described. The sampling was changed according to the day when the administration was discontinued.

**Supplementary Fig. S1** Lusutrombopag treatment scheme


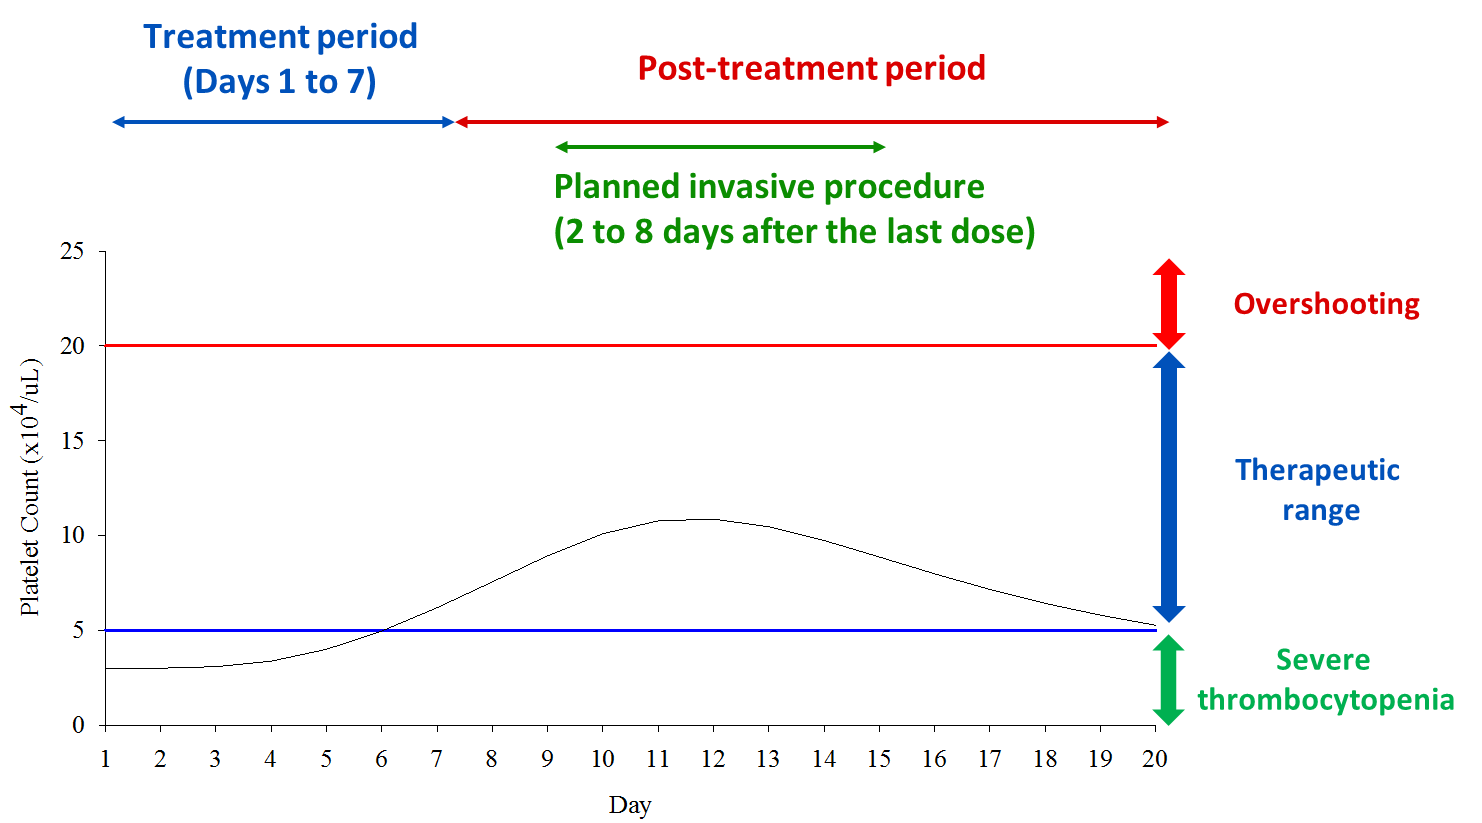


**Supplementary Fig. S2** Plots for inferential assessment of covariate effects on PK of lusutrombopag

CI = confidence interval. Shaded area: the range from 0.80 to 1.25. Closed circles with error bar: median with 95% CI from the bootstrap.


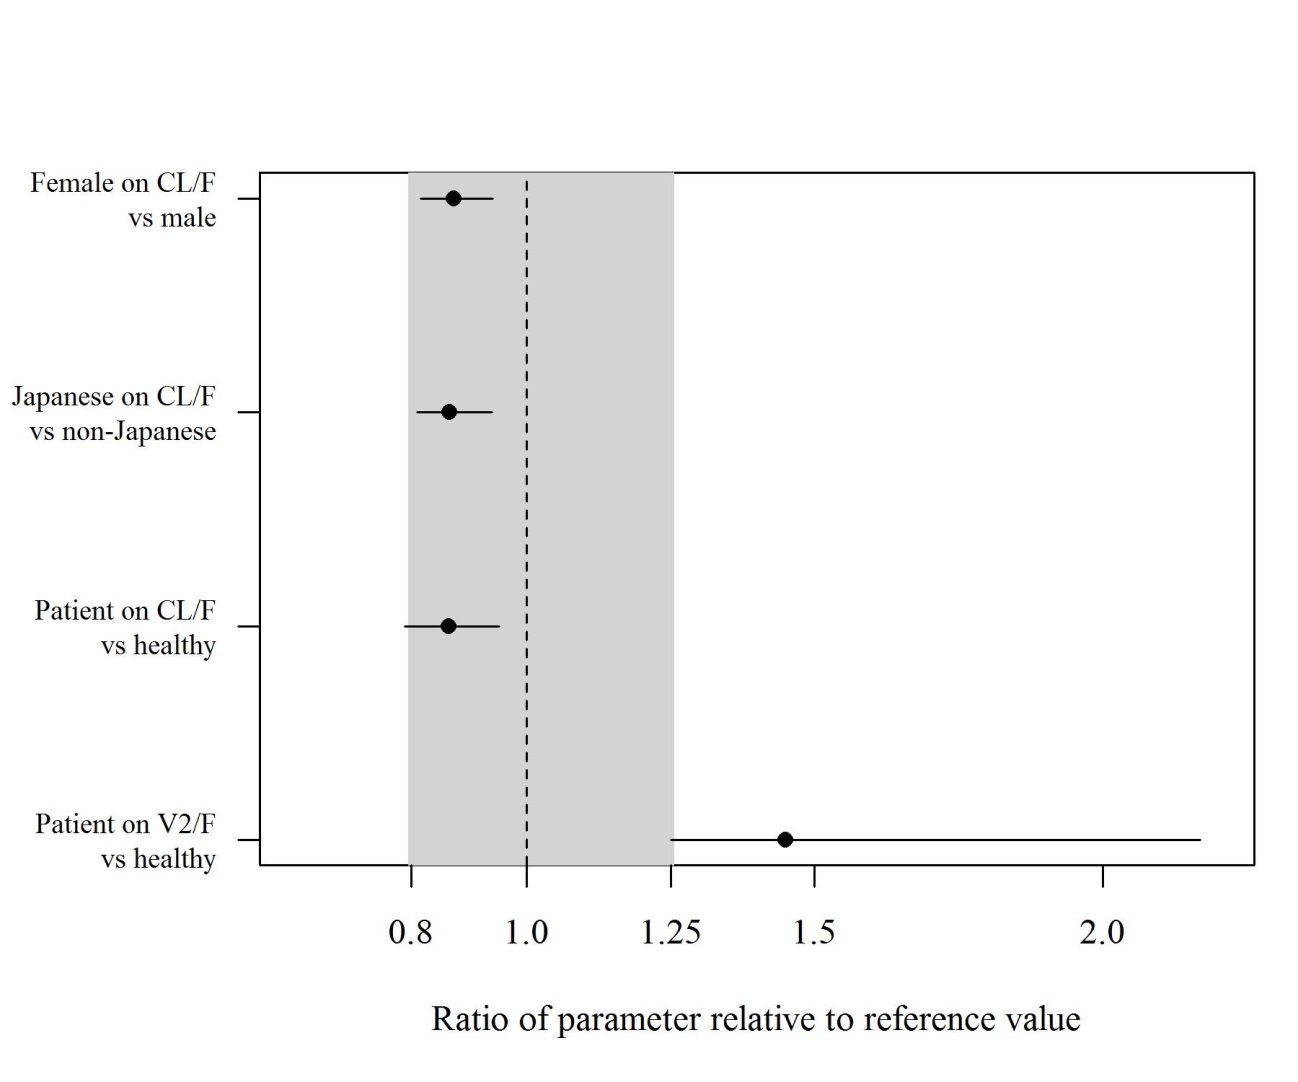


**Supplementary Fig. S3** Bayesian-estimated SLOP of base PK/PD model to background data

Solid line: a LOWESS line. Box plot: thick centre line represents median; top and base of the box represent first and third quartiles (IQR); whiskers represent the most extreme data within 1.5×IQR; and circles represent outliers beyond 1.5×IQR.

BPLT, observed baseline platelet count; IQR, interquartile range; LOWESS, locally weighted scatterplot smoothing; Non-JPN, non-Japanese; SLOP, slope relating plasma lusutrombopag concentrations.

**
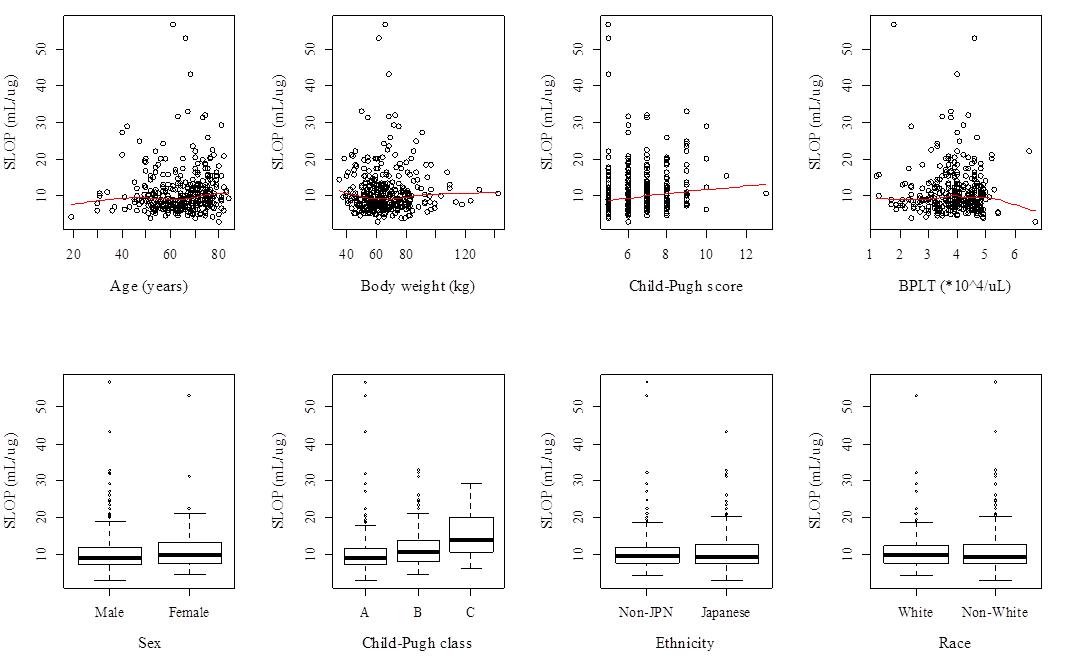
**

**Supplementary Fig. S4** Summary of simulated platelet metrics by body weight in patients with body weight of ≥80 kg treated with 3 or 4 mg once daily for 7 days.

For this analysis, 2,000 simulations were performed. Body weight was simulated according to uniform distribution. Child-Pugh score was set to <9. The simulations were performed based on a male:female ratio of 1:1 for non-Japanese CLD patients. Probability ≥50,000/uL represents the probability of attaining a platelet count of 50,000/µL on Days 9 to 14. Probability >200,000/uL represents the probability of exceeding a platelet count of 200,000/µL.

A treatment completion criterion was not applied in this simulation.

**
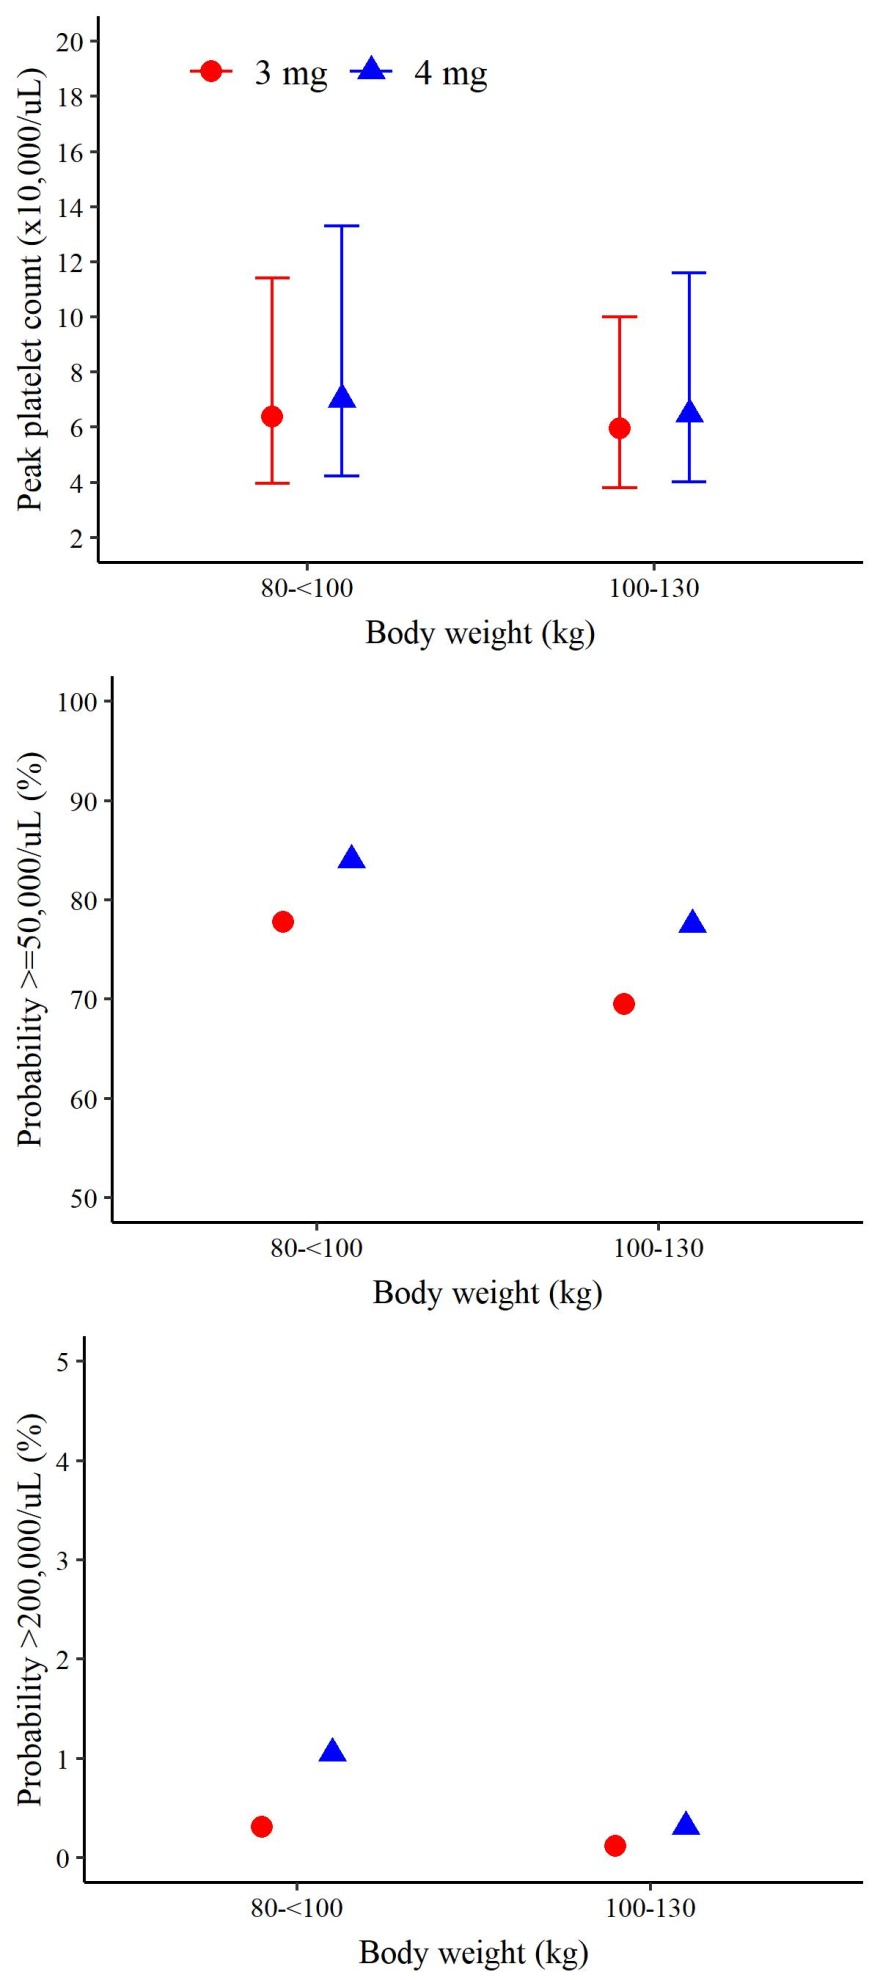
**
